# Supplementary material for: Quantification of Plastic Recovery by the Informal Waste Sector through a Probabilistic Approach
Source: Research Square preprint supplement (doi:10.21203/rs.3.rs-8038703/v1), 2025-11-28
Supplement: Supplementary file 1 [file 6974b930dadde7a323eb4357.xlsx]

## Sheet: CoverSheet
Journal of Industrial Ecology – www.wileyonlinelibrary.com/journal/jie
SUPPORTING INFORMATION FOR:
Ravisandiran, S., Navarre, N., Mogollón, J.M. & Cucurachi, S. Quantification of Plastic Recovery by the Informal Waste Sector through a Probabilistic Approach. Journal of Industrial Ecology.
This supporting information contains the results of the model, input data, and collected raw data. The results of the Monte Carlo Simulations consists of the 90% interpercentile intervals of input flow variables and output variables (flow and model outcomes) along with their maximum likelihood solutions. The input data includes the minimum, maximum and median values of the input parameters and va…

## Sheet: OutputData
Variable	5th Percentile	Max Likelihood solution	95th Percentile	Unit
F1	15646.4	20299.3	24641.4	tons per month
F2	699.842	1069.19	1927.25	tons per month
F3	2871.42	3482.65	4039.44	tons per month
F4	6482.79	9465.78	12400.4	tons per month
F5	4604.8	6281.65	7767.63	tons per month
F6	936.281	1118.32	2102.54	tons per month
F7	50.2533	103.304	288.675	tons per month
F8	699.842	1069.19	1927.25	tons per month
F9	907.618	1079.66	1670.52	tons per month
F10	1070.53	1221.62	2270.95	tons per month
F11	395.652	366.589	855.411	tons per month
F12	1803.56	2402.99	2598.6	tons per month
F13	5803.62	8714.05	11674.3	tons per month
F14	2723.28	3003.88	3788.34	tons per month
F15	1803.56	2402.99	2598.6	tons per month
F16	2723.28	3003.88	3788.34	tons per month
F17	108.473	178.402	232.053	tons per month
F18	2885.41	3182.28	3953.94	tons per month
F19	176.097	227.428	269.096	tons per month
F20	1486.13	1997.16	2148.18	tons per month
F21	5803.62	8714.05	11674.3	tons per month
F22	4283.39	5821.99	7221.49	tons per month
F23	317.328	459.655	552.701	tons per month
F24	4283.39	5821.99	7221.49	tons per month
F25	317.328	459.655	552.701	tons per month
Mismanagement Rate	51.1703	56.3966	59.1698	%
Management Rate	40.8302	43.6034	48.8297	%
Recovery Rate	22.1935	26.6358	34.3947	%
Recycling Rate	13.6546	15.6768	21.4054	%
RP Recovery Rate	42.6706	48.9901	66.892	%
NRP Recovery Rate	11.1592	16.1161	20.1255	%
IWS Recovery Rate	12.9292	14.798	20.4262	%
PET Recovery Rate	62.0663	71.2584	97.2974	%
Per cap Plastic Waste Gen (min)	73.4574	95.3018	115.687	kg per person per day
Per cap Plastic Waste Gen (max)	81.4028	105.61	128.2	kg per person per day

## Sheet: InputData
Symbol	Name	Minimum	Median	Maximum	Units	Corresponding sheet(s) for raw data	Formula
Model Input Variables
F2	Plastic scrap collected door-to-door by IWBs from households	662	1973	3284	tons per month	RawData_InformalSector
F4	Plastic waste collected with MSW as unsegregated waste from corporation bins	3843	8274	12704	tons per month	RawData_FormalSector, RawData_WasteGeneration
F6	Plastic scrap recovered by wastepickers from MSW in corporation bins	904	4972	9039	tons per month	RawData_InformalSector
F7	Plastic scrap by wastepickers from unsegregated waste in landfills	39	172	305	tons per month	RawData_InformalSector
F9	Recyclable Plastic scrap sold by formal workers to small scrap shops	879	1319	1759	tons per month	RawData_FormalSector
F12	Non-recyclable plastic collected by formal workers to MRFs	1759	2199	2638	tons per month	RawData_FormalSector
F14	Sorted recyclable plastic scrap sold by small scrap shops to large aggregators	1576	2702	3829	tons per month	RawData_InformalSector
	% of uncollected waste among total plastic waste generated	27	30	33	%	RawData_Other
	Leakage % from scrap shops	10	15	20	%	RawData_InformalSector
	% of recyclable plastic from L2 aggregator that is sent to recyclers	5	8	10	%	RawData_InformalSector
	% of non-recyclable plastic from L2 aggregator that is sent to pyrolysis plants	9	10	11	%	RawData_InformalSector
	% of uncollected waste that is openly burned	6.3	7	7.7	%	RawData_Other
Model Input parameters
	Number of IWBs in Chennai	2050	2808	3566	units	RawData_InformalSector
	Number of Waste pickers in Chennai	22780	25945	29110	units	RawData_InformalSector
	Number of Waste pickers in landfills in Chennai		950		units	RawData_InformalSector
	Number of small scrap shops in Chennai	1970	2247	2524	units	RawData_InformalSector
	Number of BOVs in Chennai		5863		units	RawData_FormalSector
	Total MSW collected by formal sector		162000		tons per month	RawData_FormalSector
	Average plastic collected per IWB	10.8	21	30.8	kg/day	RawData_InformalSector
	Average plastic collected per waste picker	1.38	6	10.7	kg/day	RawData_InformalSector
	Average recyclable plastic collected per BOV	5	8	10	kg/day	RawData_FormalSector
	Average non-recyclable plastic collected per BOV	10	13	15	kg/day	RawData_FormalSector
	% of contribution of households in MSW		68		%	RawData_WasteGeneration
	Plastic composition of MSW		7.48		%	RawData_WasteGeneration
	% of mismanagement in landfills in Chennai		60		%	RawData_Other
	% of recyclable plastic in plastic waste generated from households		32.1		%	RawData_WasteGeneration
	% of non-recyclable plastic in plastic waste generated from households		67.9		%	RawData_WasteGeneration
	% of PET in recovered recyclable plastics		24.9		%	RawData_InformalSector
	% of PET in total plastic waste generated from households		5.5		%	RawData_WasteGeneration

## Sheet: RawData_WasteGeneration
Region	Name	Value	Unit	Source	Year of data (if known)	Input Parameter
National and State level data
Total waste generated
India	Total waste generated by urban india	68.8	million tons per annum	Hande (2021)
India	% of total waste generated in India that is recyclable	20	%	Hande (2021)
India	Total plastic waste generated	1.28	million tons per annum	Rafey and Siddique (2021)
		9.49	million tons per annum	Ahmed et al. (2022)
		5.6	million tons per annum	CPCB (2012)	2012
Chennai data
MSW and Plastic waste generation
Chennai	Total (MSW) waste generated	6404	tons per day	Parvathamma (2014)
		130000	tons per month	Ananthakrishnan G (2023)	2022
Chennai	Total plastic waste generated	116212	tons per annum	ENVIS Centre (2016)	2013
		8000	tons per month	Hande (2019)
		130000	tons per annum	CPCB (2015)
	Total generation of recylable plastic	140000	tons per annum	Komal Gautam (2023)	2023
		205313	tons per annum	Los (2022)
Chennai	% of plastic waste in total MSW generated	7.48	%	CMDA (n.d.)	2006
		7.04	%	ENVIS Centre (2016)	2015
Source of MSW
Chennai	% Contribution of Households
	% of total waste generated that is from small and medium generators	70	%	Hande (2021)
	Contribution of households to total waste generated	68	%	CMDA (n.d.)	1996
	Contribution of households to total waste generated	68	%	ENVIS Centre (2016)	2015
Data from specific surveys conducted within Chennai
Survey of Ward 100 in Chennai
Ward 100, Chennai	Population	45000		Hande (2021)	2017-2019
Ward 100, Chennai	Total waste generation per day	39	MT	Hande (2021)	2017-2019
Ward 100, Chennai	Total per capita waste generation per day	0.8	kg	Hande (2021)	2017-2019
Ward 100, Chennai	Number of streets	185		Hande (2021)	2017-2019
Ward 100, Chennai	Composition of waste generated			Hande (2021)	2017-2019
	Wet waste	19	MT
	Paper	2	MT
	Plastic	3	MT
	Glass	0.75	MT
	Metal	3	MT
	Hazardous and inerts	9	MT
(Indoor) Brand Audit of Plastic Waste in Chennai, 2021
Chennai	Composition of plastic waste			Narayanan and Kapilavai (2021)	2021
	Reyclable polymers (PET, HDPE, PVC, LDPE, PP)	32.1	%
	Non-Reyclable polymers (PS, Other/no information)	67.8	%
	PET	5.5	%
	HDPE	5.1	%
	PVC	0.9	%
	LDPE	12.3	%
	PP	8.3	%
	PS	0.8	%
	Other/no information	67	%
Chennai	Plastic Use Composition			Narayanan and Kapilavai (2021)	2021
	Food packaging	62.6	%
	Packing material	6	%
	Personal care	16.1	%
	Household products	15.3	%
(Outdoor) Brand Audit of Plastic Waste in Chennai, 2022
Chennai	% of Multi-Layered Plastic in plastic waste audited	60	%	Narayanan and Rajkumar (2022)	2022
Chennai	Composition of plastic waste			Narayanan and Rajkumar (2022)	2022
	PET	3.58	%
	HDPE	1.63	%
	PVC	0	%
	LDPE	14.01	%
	PP	3.58	%
	PS	0.65	%
	Other/no information	76.55	%
Chennai	Plastic Use Composition			Narayanan and Rajkumar (2022)	2022
	Food packaging	82	%
	Packing material	5.8	%
	Personal care	3.2	%
	Household products	6.1	%

## Sheet: RawData_InformalSector
Region	Name	Value	Unit	Source	Year of data (if known)	Notes (if estimated)	Input Parameter
Number of workers
Global, National and other regions
Global	Number of Waste pickers	4922319		Lizner and Lange (2013)	2016	Calculated from % of urban population (0.41% × 1.196e9)
India	Total number of wastepickers in India	1.5	million	Hande (2021)
		6	million	Bonner (2008)
Chennai
Chennai	Number of waste pickers	RANGE: 22780 - 29110
		22780-25244		Hande (2021); Census of India (2011) ; GCC (n.d.)	2019	Extrapolated from Ward 100 data (Hande, 2021) by scaling with the ratio of the population of Ward 100 to the population of Chennai
		26269-29110		Lau et al. (2020); Chaturvedi (2010); Census of India (n.d.)	2016	Estimated from % of urban population (0.41%) × total population of Chennai (6407000)
Ward 100	Number of waste pickers	160		Hande (2021)
Chennai	Number of Waste pickers in landfills	950		Ravi and Kumar (2015)	2015
Chennai	Total number of IWBs	RANGE: 2050-3566
	Total IWBs in Chennai, extrapolated from ward 132	3566		Interview, Census of India (2011)	2023	Extrapolated by projecting population of ward 132 from 2011 Census data (58648) to 2023 by using growth rate of total population of Chennai from 2011 to 2023 (1.379%) and scaling using populations in 2023
	Total IWBs in Chennai, extrapolated from Pammal region	2050		Interview	2023	Extrapolated number of IWBs in Pammal region to Chennai by scaling with population
Ward 132	Approximate number of IWBs in Ward 132, Chennai	45		Interview	2023
Pammal region	Number of IWBs in Pammal region (population of 100,000)	32		Interview	2023
	Number of IWBs per scrap shop	8		Interview	2023
Chennai	Number of small scrap shops	RANGE: 1970 - 2524
	Total number of small scrap shops	2000		Hande (2021)
	Total number of L1 aggregators	1970		Hande (2019)
	Estimate of total number of scrap shops	2278 - 2524		Hande (2021); Census of India (2011); GCC (n.d.)	2019	Extrapolated from Ward 100 data from Hande (2021)
Ward 100	Number of scrap shops	16		Hande (2021)
Chennai	Total number of small scrap shops	2000		Hande (2021)
Chennai	Number of L2 aggregators (all materials)	280		Hande (2019)
Chennai	Number of processors (all materials)	46		Hande (2019)
Chennai	Number of employees in a small scrap shop	1 to 2	employees	Hande (2021)
Chennai	Average shop size for small scrap shop	125	sq feet	Hande (2021)
Chennai	Number of employees in a large scrap shop	7 to 10	employees	Hande (2021)
Chennai	Average shop size for large scrap shop	5000	sq feet	Hande (2021)
Waste Handled by IWS
India	% of plastic recycling done by informal sector	20	%	Rafey and Siddique (2021)
Chennai	% of generated plastic that is recovered by the IWS	11	%	Hande (2019)
Chennai	% of recovery of post-consumer plastic by IWS	20	%	Hande (2019)
Chennai	% of total recyclables handled by IWS	33	%	Aneez (2017)	2015
		25	%	Hande (2019)
Chennai	% of recyclable waste collected by IWS	24	%	Komal Gautham (2023)
Chennai	% PET in plastics recovered by the IWS	24.9	%	Hande (2019)
Chennai	Amount of material collected by the informal sector	130000	tons per annum	Hande (2021)
		180000	tons per annum	Hande (2019)
Chennai	Total waste recovery by ragpickers and IWBs	400	tons per day	CMDA (n.d.)
Chennai	Amount of plastic collected by the informal sector	RANGE: 1667 - 2307	tons per month
		1666.67	tons per month	Hande (2019)
		1845.6	tons per month	CMDA (n.d.)		Estimated from total material recovered by IWS and % of plastic among material collected by IWS
		2307	tons per month	Hande (2019)
Chennai	% by volume of plastic among all material handled by IWS	0.153846		Hande (2019); Hande (2021)		Estimated from total plastic collected by IWS and total material collected by IWS
Waste handled per worker
	Average amount of plastic collected per waste picker (by foot)	RANGE: 1.38 - 10.7	kg/day
	Range of estimates	1.38 - 2.61	kg/day	Agarwal et al. (2005); Sharholy et al. (2008); Chandramohan et al (2010)		Estimated from total waste collected per wastepicker and applying composition of plastic among that (15.38% plastic among total volume handled by IWS)
	Range of values directly reported in literature	6.23 - 10.7	kg/day	Chandramohan et al. (2010); Hande (2019); Lau et al. (2020)
	Average amount of plastic collected per IWB (pushcart)	RANGE: 10.77 - 30.76	kg/day
	Estimate	30.76	kg/day	Agarwal et al., (2005)
	Directly reported in literature	323	kg/month	Hande (2019)
Global, national, and other regions
Global	Plastic collected per wastepicker in urban archetypes from:
	Dumpsites	2.9	tons per annum	Lau et al. (2020)
	Streets	2.1	tons per annum	Lau et al. (2020)
	Average	2.5	tons per annum	Lau et al. (2020)
India	Average amount of waste collected by informal collectors	49	kg/day	Lizner and Lange (2013)
India	Average amount of waste collected by informal collectors
	on foot	9-17	kg/day	Agarwal et al., (2005)
	on cycle	14-25	kg/day	Agarwal et al., (2005)
	on pushcarts	200	kg/day	Agarwal et al., (2005)
Delhi	Average quantity of solid waste materials collected by one rag picker	10-15	kg/day	Sharholy et al. 2008
Delhi	Average quantity of recyclables collected by one ragpicker	36	kg/day	Agarwal et al. (2005); Nandy et al. (2015)
Trichy	Average volume of waste collected by ragpickers	13.6	kg/day	Chandramohan, et al. (2010)
	Average volume of plastic collected by ragpickers	6.29	kg/day	Chandramohan, et al. (2010)
Chennai
Chennai	Average volume of waste collected by informal workers
	Average waste collected by L0 aggregator (IWBs, and wastepickers)	1000	kg/month	Hande (2021)	2017-2019
	Average waste collected by waste pickers on foot from garbage bins in a day	10	kg/day	Interview
Chennai	Average volume of plastic waste collected by informal workers
	Average volume of plastic of a L0 aggregator (IWBs and WPs)	323	kg/month	Hande (2019)	2017-2019
Chennai	Average volume of plastic handled by L1 aggregator	RANGE: 800-1517	kg/month
		800	kg/month	Kabadiwalla Connect (2021)	2017-2019
		1517	kg/month	Hande (2019)	2017-2019
		1000	kg/month	Interview
		1.43	tons/month	Los (2022)
Chennai	Average amount of plastic scrap handled by L2 aggregators	8833	kg/month	Hande (2019)	2017-2019
Chennai	Distribution of destination of non-recyclable plastic scrap from L2 aggregator
	Recycling	5-10	%	Interview
	Pyrolysis Plants	10	%	Interview
	Cement Plants	80	%	Interview
Chennai	Waste generated at L1 aggregator (small scrap shops)	10	kg/day	Interview
	% of total waste collected	10-20	%	Interview

## Sheet: RawData_FormalSector
Region	Name	Value	Unit	Source	Year of data (if known)	Input Parameter
Infrastructure
Chennai	Total number of bins on the roads	11511		Jayaraman (2023)	2023
Chennai	Number of tricycles	5400		GCC (n.d.)	2023
Chennai	Number of transfer stations	7		GCC (n.d.)	2023
Chennai	Total number of BOVs	5863		GCC (n.d.)	2023
Chennai	Number of centres for plastic baling to be sent to cement factories	5		Gautam (2023)	2023
Chennai	Capacity of one BOV	350	kg per trip	Hande (2021)
Chennai	Capacity of one corporation bin	491.803	kg/day	Hande (2021)
Chennai	Capacity of one tricycle	152.778	kgs per trip	Hande (2021)
Chennai	Total capacity of BOVs for MSW	61561.5	tons per month	Hande (2021); GCC (n.d.)
Chennai	Total capacity of corporation bins for MSW	169834	tons per month	Hande (2021); GCC (n.d.)
Chennai	Total capacity of tricycles for MSW	24750	tons per month	Hande (2021); GCC (n.d.)
Number of workers
Chennai	Sweepers	6900		Sanjeevi and Shahabudeen (2016)
Chennai	Number of workers with Tricycles collecting waste	5022
Chennai	Total workforce	19390
Chennai	Total number of sanitary workers (sweeping, door-to-door collection, transporting)	15000		Nileena MS (2016)
	Number of permanent employees	8500
Chennai	Total workers employed	19109		GCC (n.d.)	2023
	Permanent workers	6990		GCC (n.d.)	2023
	Panchayat/NMR/Consolidated	545		GCC (n.d.)	2023
	NULM (SHGs) Temporary	8171		GCC (n.d.)	2023
	Ramky (private contractor)	3403		GCC (n.d.)	2023
Landfill
Chennai	% of waste from the city that goes to each landfill			(CMDA, n.d.)
	Kodungaiyur	45	%
	Perungudi	55	%
Chennai	% of MSW dumped in landfills	91	%	ENVIS Centre (2016)	2000
Chennai	% of waste dumped in open landfills	91	%	Hande (2021)
Chennai	Daily waste disposed in landfill
	Kondungaiyur landfill	2600 - 2800	tonnes per day	GCC (n.d.)
	Perungudi landfill	2400-2600	tonnes per day	GCC (n.d.)
Waste collected
Chennai	Total solid waste collected every day	5400	tons per day	GCC (n.d.)
Chennai	Daily quantity of waste transferred to transfer stations	3600	tons per day	GCC (n.d.)
Chennai	Recyclable plastic waste that is disposed off properly, including IWS	30000	tons per annum	Gautam (2023)
Chennai	Amount of recyclable waste sorted by conservancy workers	50	tons per day	Gautam (2023)
Chennai	Nonsaleable dry waste collected by formal sector	500	tons per day	Kavya NV (2019)	2019
Chennai	Plastic waste collected per worker in a BOV
	Recyclable plastic scrap that is sold to informal scrap shop	5-10	kg/day	Interviews
	Non-recyclable plastic scrap	10-15	kg/day	Interviews
Ward 100, Chennai
Chennai	Population	45000		Hande (2021)
Chennai	Number of BOVs	8		Hande (2021)
Chennai	Total capacity of BOVs in Ward 100	2.8	tons per trip	Hande (2021)
Chennai	Number of corporation bins	61		Hande (2021)
Chennai	Total capacity of corporation bins in Ward 100	30	tons per day	Hande (2021)
Chennai	Tricycles	36		Hande (2021)
Chennai	Total capacity of tricycles in Ward 100	5.5	tons per trip	Hande (2021)

## Sheet: RawData_Other
Region	Name	Value	Unit	Source	Year of data	Input Parameter
Chennai demographic data and administrative boundaries
Chennai	Population of Chennai in 2023	6407000		Census of India (2011)	2023
		7100000		GCC (n.d.)	2023
Chennai	Number of zones	15		GCC (n.d.)
Chennai	Number of wards	200		GCC (n.d.)
Ward 100	Population of Ward 100	45000		(Hande 2021)
Downstream plastic waste hotspot mapping around Adyar and Cooum rivers
Chennai	Total plastic waste generation	70719	tons per annum	Kabadiwalla Connect (2023)
Chennai	Uncollected waste	21202	tons per annum	Kabadiwalla Connect (2023)
Chennai	Retained on land	10195	tons per annum	Kabadiwalla Connect (2023)
Chennai	Openly burnt plastic waste	1480	tons per annum	Kabadiwalla Connect (2023)
Chennai	Estimated % of uncollected MSW out of all plastic waste generated	29.98	%	Kabadiwalla Connect (2023)
Chennai	Estimated % of uncollected waste that is retained on land (including street sweeping)	48.09	%	Kabadiwalla Connect (2023)
Chennai	Estimated % of openly burnt plastic waste out of all uncollected waste	6.98	%	Kabadiwalla Connect (2023)
Landfill Mismanagement
Global	Percentage of waste mismanaged in landfills in lower-middle-income countries	60	%	Borrelle et al. (2020)
South Asia	Percentage of sanitary landfills among waste dumped in landfills and open dumps in South asia	17	%	Kaza et al. (2018)
